# Supplementary material for: First Generation and Low Income Students: Using the NSSE Data To Study Effective Educational Practices and Students. Self-Reported Gains. AIR 2002 Forum Paper.
Source: Oxford University Press journal article supplement (doi:10.1242/dev.137224), 2002-06-01
Supplement: dev137224supp.pdf [file dev137224supp.pdf]

### *PASPA3*

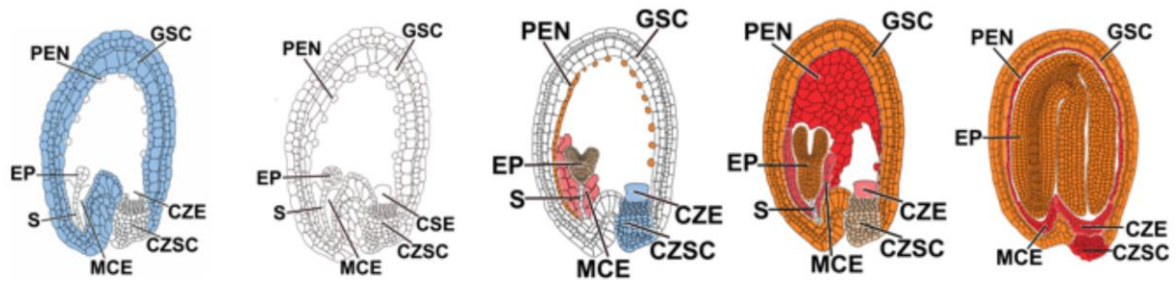

### *BFN1*

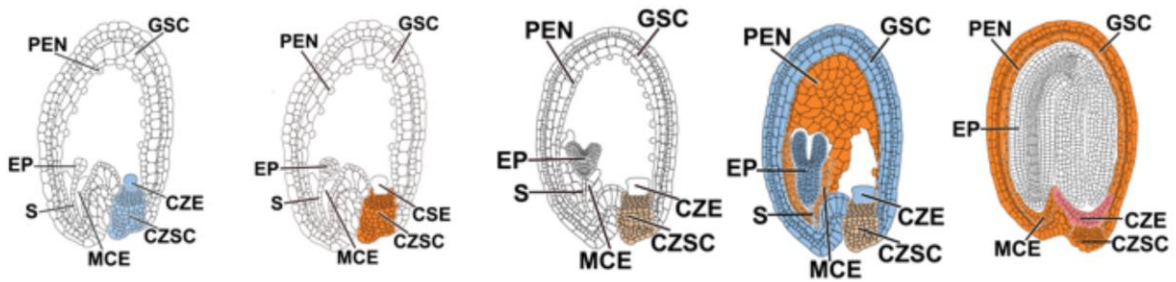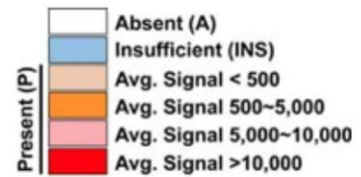

### Supplementary Figure 1

Expression data for *PASPA3* and *BFN1* downloaded from the Seed Gene Network resource (<http://seedgenenetwork.net/>)

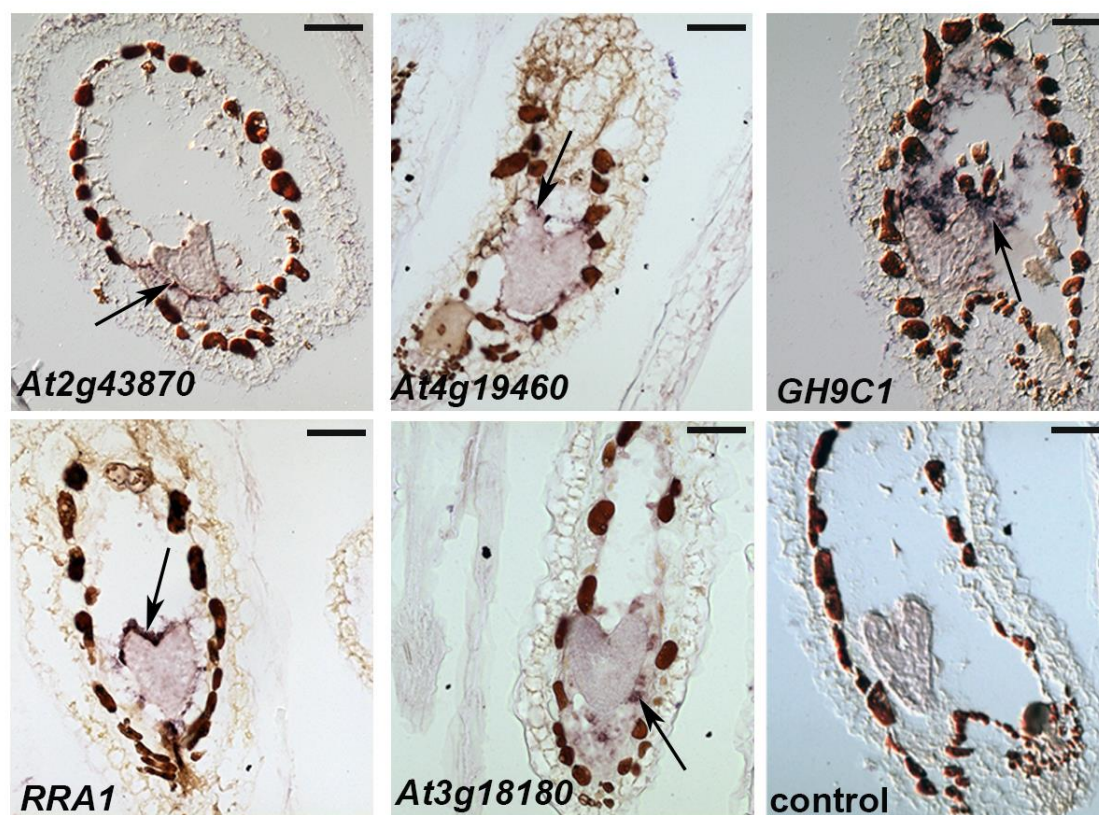

### Supplementary Figure 2

Analysis of transcript accumulation from ZOU-dependent genes annotated as encoding cell wall modifiers by *in situ* hybridisation in wild-type seeds. Signal is shown as blue/black colouration (white arrows). Red/brown staining of the endothelium is a background artefact in seeds. Scale bar = 50  $\mu$ m.

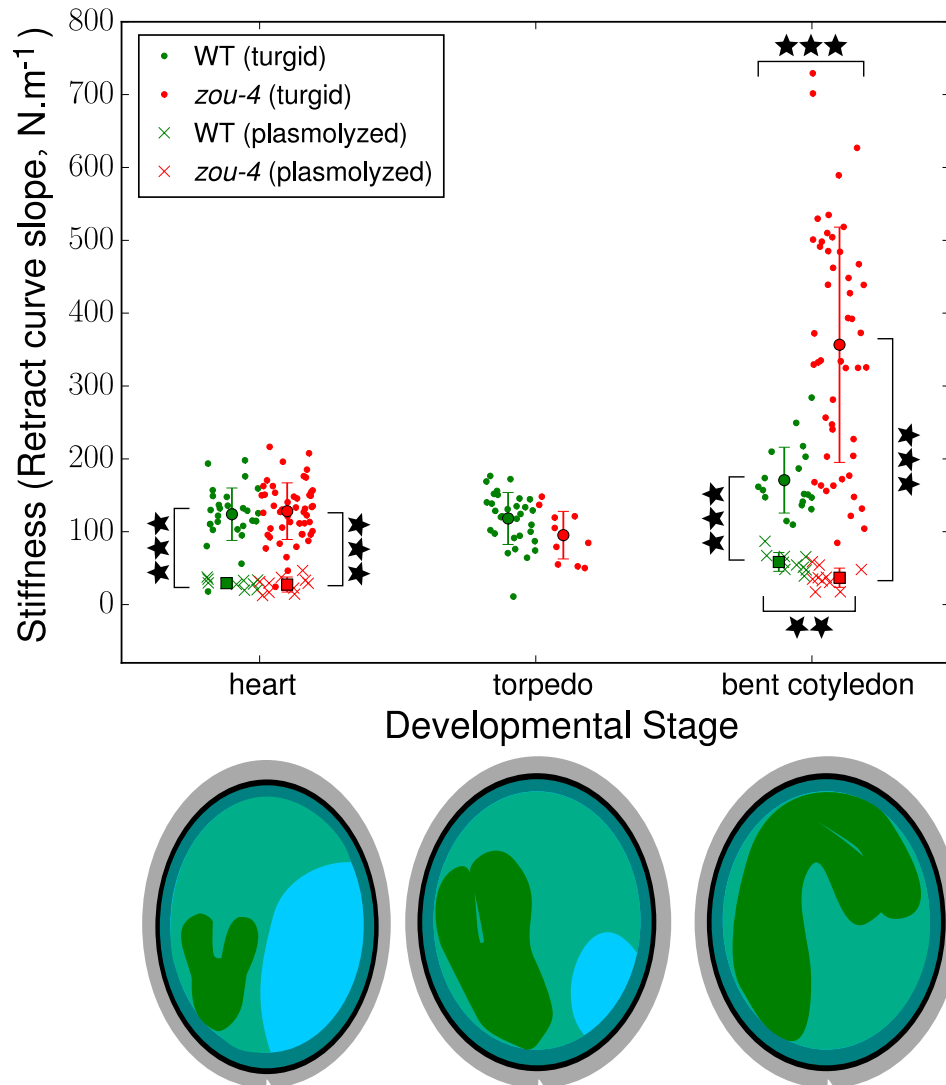

### Supplementary Figure 3

Comparison of the apparent stiffness of wild-type and *zou-4* mutant seeds at different developmental stages. Stiffness values were extracted from the early linear retract phase of force/displacement curves obtained using a nano-indenter as described in (Beauzamy et al., Submitted). Effects of osmotic treatment (0.7M mannitol for 90 minutes) on seed stiffness are shown. Developmental stages of wild-type seeds are shown. Differences between populations were evaluated statistically using a Wilcoxon rank-sum test. \*\*= $p < 0.01$ , \*\*\*= $p < 0.001$ . Error bars indicate standard deviation around the arithmetic mean.

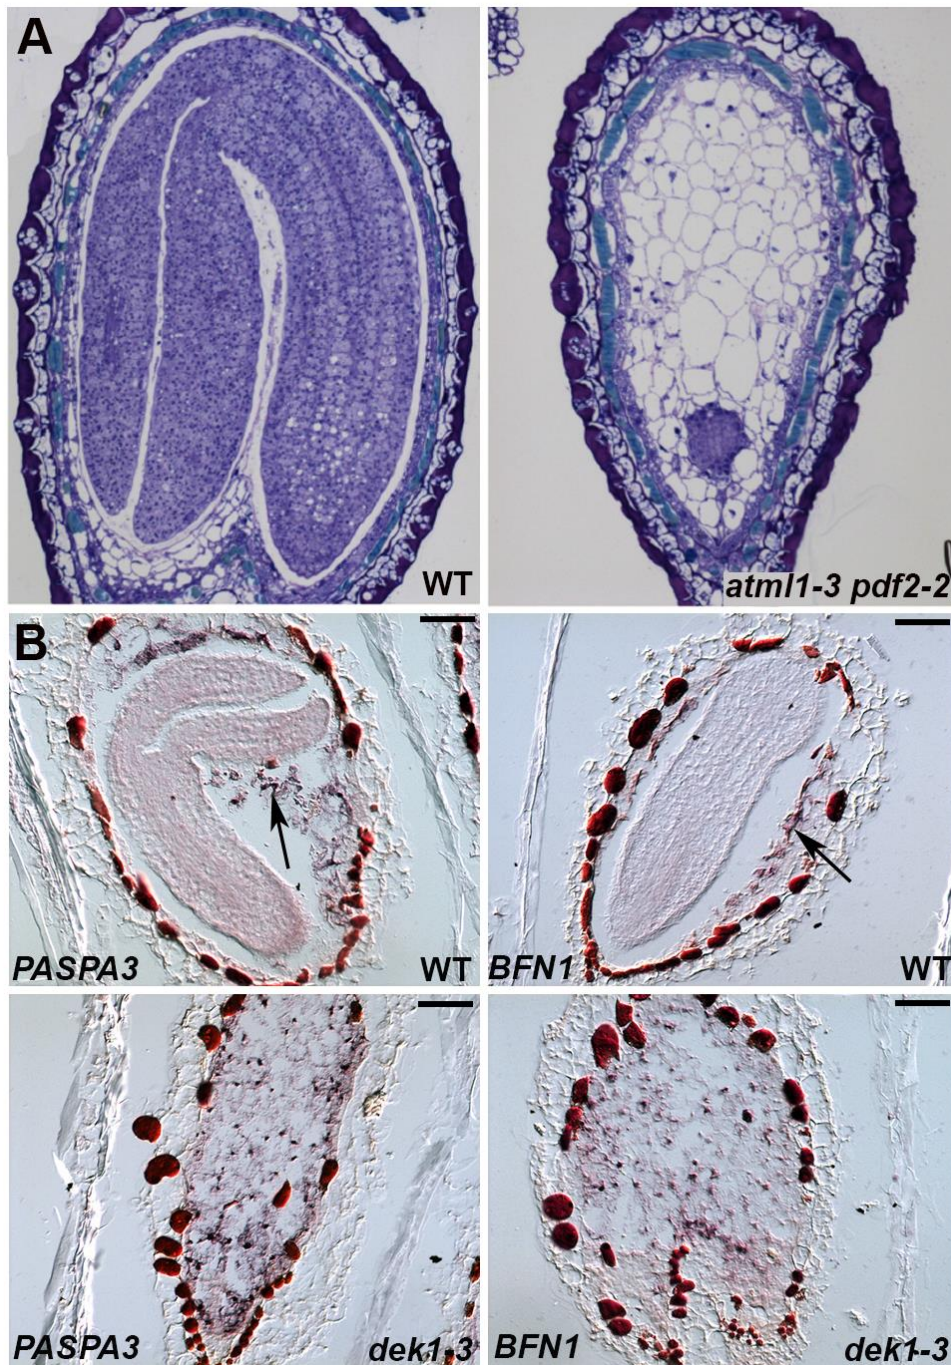

#### Supplementary Figure 4

A) Toluidine-blue stained resin sections showing the structure of wild-type, and *atml1-3 pdf2-2* endosperm. B) Analysis of *PASPA3* and *BNF1* transcript accumulation by *in situ* hybridisation in wild-type and *dek1-3* seeds. Signal is shown as blue/black colouration (white arrows). Red/brown staining of the endothelium is a background artefact in seeds. Scale bar = 50  $\mu$ m.

Table S1. Primer sequences

| Primer name        | Primer sequence                                               |
|--------------------|---------------------------------------------------------------|
|                    | <b>AMPLIFICATION OF IN SITU PROBES</b>                        |
| At3g18180attB1ATG  | GGGGACAAGTTTGTACAAAAAAGCAGGCTCAACAATGACAAAGAAGGAT<br>ATTC     |
| At3g18180attB2STOP | GGGGACCACTTTGTACAAGAAAGCTGGGTCTTACTGACTGATTATGC<br>AATAG      |
| At4g19460attB1ATG  | GGGGACAAGTTTGTACAAAAAAGCAGGCTCAACAATGAATCCTTTAATT<br>GAAC     |
| At4g19460attB2STOP | GGGGACCACTTTGTACAAGAAAGCTGGGTCTTAAGGGTAAATACAAAAT<br>TTCTG    |
| At1g75120attB1ATG  | GGGGACAAGTTTGTACAAAAAAGCAGGCTCAACAATGGCGGTTTCGTAA<br>AGAGAAAG |
| At1g75120attB2STOP | GGGGACCACTTTGTACAAGAAAGCTGGGTCTTATGAACCATCACGGAA<br>C         |
| At2g43870attB1ATG  | GGGGACAAGTTTGTACAAAAAAGCAGGCTCAACAATGGCTTCACTTCTT<br>GTCCTC   |
| At2g43870attB2STOP | GGGGACCACTTTGTACAAGAAAGCTGGGTCTCATAGACAATTTGGCTG              |
| GH9C1attB1ATG      | GGGGACAAGTTTGTACAAAAAAGCAGGCTCAACAATGAGGAAGTTTGGT<br>GGATC    |
| GH9C1attB2STOP     | GGGGACCACTTTGTACAAGAAAGCTGGGTCTTAGTTGTAAC TCAAACT<br>GAG      |
|                    | <b>Q-RT-PCR ANALYSIS</b>                                      |
| PASPA3 F           | CTCTGTAAAAATGGGAAGTAGGTTCC                                    |
| PASPA3 R           | CTCTCCTTTGAAGTGCTTCGG                                         |

|           |                            |
|-----------|----------------------------|
| BFN1 F    | CATCGGCTTTTAGATCATCCAC     |
| BFN1 R    | CACTTCTAAACAAAGCAGTCCAC    |
| q18180For | CTCAGCCCTTTACCAATCGT       |
| q18180Rev | TTCTTTGGAGATTGTAGTGTTGGT   |
| q19460For | AAGCTTTGACGGCGGTTAT        |
| q19460Rev | TCTCTCCGCCAATCTCTCC        |
| qRRA1For  | TCAGATAAACTCGAAAGAATGCAA   |
| qRRA1Rev  | CATCTTGCTTGCCATTAACGTA     |
| q43870For | AGCTTCTTTATGGGATTGTAAAAAGT |
| q43870Rev | TGAGCTCTGAAATCCTATTGTCTG   |
| qGH9C1F   | GGCCTATTCGCTAAACTCTATGGAG  |
| qGH9C1R   | ATTTGTGCACCTGATTGCTTG      |
| qRGP3L    | ACACCATTGATGATGATTGCTT     |
| qRGP3R    | TGTTAAAGAAATGCGGAGTTGA     |
